# Supplementary material for: Financial transfer to resolve the equity trade-off between developed and developing countries for national net-zero commitments
Source: Research Square preprint supplement (doi:10.21203/rs.3.rs-5972293/v1), 2025-10-31
Supplement: Supplementary file 1 [file 91adfc07bf6521a98d6452a9.pdf]

Supplementary Information

Supplementary Tables

Supplementary Table 1. Aggregated regional classifications and AIM-Hub native regions

| Native Region Code | Native Region Name               | R5 classification | Developed/developing |
|--------------------|----------------------------------|-------------------|----------------------|
| USA                | USA                              | R5OECD90+EU       | Developed            |
| XE25               | EU                               | R5OECD90+EU       | Developed            |
| XER                | Rest of Europe                   | R5OECD90+EU       | Developed            |
| TUR                | Turkey                           | R5OECD90+EU       | Developed            |
| XOC                | New Zealand and Australia        | R5OECD90+EU       | Developed            |
| CHN                | China                            | R5ASIA            | Developing           |
| IND                | India                            | R5ASIA            | Developing           |
| JPN                | Japan                            | R5OECD90+EU       | Developed            |
| XSE                | Rest of East and South East Asia | R5ASIA            | Developing           |
| XSA                | Rest of Asia                     | R5ASIA            | Developing           |
| CAN                | Canada                           | R5OECD90+EU       | Developed            |
| BRA                | Brazil                           | R5LAM             | Developing           |
| XLM                | Rest of Latin America            | R5LAM             | Developing           |
| CIS                | Former USSR                      | R5REF             | Developing           |
| XME                | Middle East                      | R5MAF             | Developing           |
| XNF                | North Africa                     | R5MAF             | Developing           |
| XAF                | Other Africa                     | R5MAF             | Developing           |

Supplementary Table 2. AIM-Hub native region definition

| Native Region Name    | AIM region code | ISO Code | Country              |
|-----------------------|-----------------|----------|----------------------|
| Rest of Latin America | XLM             | ABW      | Aruba                |
| Rest of Asia          | XSA             | AFG      | Afghanistan          |
| Other Africa          | XAF             | AGO      | Angola               |
| Rest of Latin America | XLM             | AIA      | Anguilla             |
| Rest of Europe        | XER             | ALB      | Albania              |
| Rest of Europe        | XER             | AND      | Andorra              |
| Rest of Latin America | XLM             | ANT      | Netherlands Antilles |

|                           |      |     |                                 |
|---------------------------|------|-----|---------------------------------|
| Middle East               | XME  | ARE | United Arab Emirates            |
| Rest of Latin America     | XLM  | ARG | Argentina                       |
| Former USSR               | CIS  | ARM | Armenia                         |
| Rest of Asia              | XSA  | ASM | American Samoa                  |
| Rest of Asia              | XSA  | ATF | French Southern Territories     |
| Rest of Latin America     | XLM  | ATG | Antigua and Barbuda             |
| New Zealand and Australia | XOC  | AUS | Australia                       |
| EU                        | XE25 | AUT | Austria                         |
| Former USSR               | CIS  | AZE | Azerbaijan                      |
| Other Africa              | XAF  | BDI | Burundi                         |
| EU                        | XE25 | BEL | Belgium                         |
| Other Africa              | XAF  | BEN | Benin                           |
| Other Africa              | XAF  | BFA | Burkina Faso                    |
| Rest of Asia              | XSA  | BGD | Bangladesh                      |
| Rest of Europe            | XER  | BGR | Bulgaria                        |
| Middle East               | XME  | BHR | Bahrain                         |
| Rest of Latin America     | XLM  | BHS | Bahamas                         |
| Rest of Europe            | XER  | BIH | Bosnia and Herzegovina          |
| Former USSR               | CIS  | BLR | Belarus                         |
| Rest of Latin America     | XLM  | BLZ | Belize                          |
| Rest of Latin America     | XLM  | BMU | Bermuda                         |
| Rest of Latin America     | XLM  | BOL | Bolivia, Plurinational State of |
| Brazil                    | BRA  | BRA | Brazil                          |
| Rest of Latin America     | XLM  | BRB | Barbados                        |
| Rest of Asia              | XSA  | BRN | Brunei Darussalam               |
| Rest of Asia              | XSA  | BTN | Bhutan                          |
| Rest of Latin America     | XLM  | BVT | Bouvet Island                   |
| Other Africa              | XAF  | BWA | Botswana                        |
| Other Africa              | XAF  | CAF | Central African Republic        |
| Canada                    | CAN  | CAN | Canada                          |
| Rest of Asia              | XSA  | CCK | Cocos (Keeling) Islands         |
| Rest of Europe            | XER  | CHE | Switzerland                     |
| Rest of Latin America     | XLM  | CHL | Chile                           |
| China                     | CHN  | CHN | China                           |
| Other Africa              | XAF  | CIV | Côte d'Ivoire                   |

|                       |      |     |                                       |
|-----------------------|------|-----|---------------------------------------|
| Other Africa          | XAF  | CMR | Cameroon                              |
| Other Africa          | XAF  | COD | Congo, the Democratic Republic of the |
| Other Africa          | XAF  | COG | Congo                                 |
| Rest of Asia          | XSA  | COK | Cook Islands                          |
| Rest of Latin America | XLM  | COL | Colombia                              |
| Other Africa          | XAF  | COM | Comoros                               |
| Other Africa          | XAF  | CPV | Cape Verde                            |
| Rest of Latin America | XLM  | CRI | Costa Rica                            |
| Rest of Latin America | XLM  | CUB | Cuba                                  |
| Rest of Asia          | XSA  | CXR | Christmas Island                      |
| Rest of Latin America | XLM  | CYM | Cayman Islands                        |
| EU                    | XE25 | CYP | Cyprus                                |
| EU                    | XE25 | CZE | Czech Republic                        |
| EU                    | XE25 | DEU | Germany                               |
| Other Africa          | XAF  | DJI | Djibouti                              |
| Rest of Latin America | XLM  | DMA | Dominica                              |
| EU                    | XE25 | DNK | Denmark                               |
| Rest of Latin America | XLM  | DOM | Dominican Republic                    |
| North Africa          | XNF  | DZA | Algeria                               |
| Rest of Latin America | XLM  | ECU | Ecuador                               |
| North Africa          | XNF  | EGY | Egypt                                 |
| Other Africa          | XAF  | ERI | Eritrea                               |
| Other Africa          | XAF  | ESH | Western Sahara                        |
| EU                    | XE25 | ESP | Spain                                 |
| EU                    | XE25 | EST | Estonia                               |
| Other Africa          | XAF  | ETH | Ethiopia                              |
| EU                    | XE25 | FIN | Finland                               |
| Rest of Asia          | XSA  | FJI | Fiji                                  |
| Rest of Latin America | XLM  | FLK | Falkland Islands (Malvinas)           |
| EU                    | XE25 | FRA | France                                |
| Rest of Europe        | XER  | FRO | Faroe Islands                         |
| Rest of Asia          | XSA  | FSM | Micronesia, Federated States of       |
| Other Africa          | XAF  | GAB | Gabon                                 |
| EU                    | XE25 | GBR | United Kingdom                        |
| Former USSR           | CIS  | GEO | Georgia                               |

|                                  |      |     |                                   |
|----------------------------------|------|-----|-----------------------------------|
| Other Africa                     | XAF  | GHA | Ghana                             |
| Rest of Europe                   | XER  | GIB | Gibraltar                         |
| Other Africa                     | XAF  | GIN | Guinea                            |
| Rest of Latin America            | XLM  | GLP | Guadeloupe                        |
| Other Africa                     | XAF  | GMB | Gambia                            |
| Other Africa                     | XAF  | GNB | Guinea-Bissau                     |
| Other Africa                     | XAF  | GNQ | Equatorial Guinea                 |
| EU                               | XE25 | GRC | Greece                            |
| Rest of Latin America            | XLM  | GRD | Grenada                           |
| Rest of Latin America            | XLM  | GRL | Greenland                         |
| Rest of Latin America            | XLM  | GTM | Guatemala                         |
| Rest of Latin America            | XLM  | GUF | French Guiana                     |
| Rest of Asia                     | XSA  | GUM | Guam                              |
| Rest of Latin America            | XLM  | GUY | Guyana                            |
| China                            | CHN  | HKG | Hong Kong                         |
| Rest of Asia                     | XSA  | HMD | Heard Island and McDonald Islands |
| Rest of Latin America            | XLM  | HND | Honduras                          |
| Rest of Europe                   | XER  | HRV | Croatia                           |
| Rest of Latin America            | XLM  | HTI | Haiti                             |
| EU                               | XE25 | HUN | Hungary                           |
| Rest of East and South East Asia | XSE  | IDN | Indonesia                         |
| India                            | IND  | IND | India                             |
| Rest of Asia                     | XSA  | IOT | British Indian Ocean Territory    |
| EU                               | XE25 | IRL | Ireland                           |
| Middle East                      | XME  | IRN | Iran, Islamic Republic of         |
| Middle East                      | XME  | IRQ | Iraq                              |
| Rest of Europe                   | XER  | ISL | Iceland                           |
| Middle East                      | XME  | ISR | Israel                            |
| EU                               | XE25 | ITA | Italy                             |
| Rest of Latin America            | XLM  | JAM | Jamaica                           |
| Middle East                      | XME  | JOR | Jordan                            |
| Japan                            | JPN  | JPN | Japan                             |
| Former USSR                      | CIS  | KAZ | Kazakhstan                        |
| Other Africa                     | XAF  | KEN | Kenya                             |
| Former USSR                      | CIS  | KGZ | Kyrgyzstan                        |

|                                  |      |     |                                            |
|----------------------------------|------|-----|--------------------------------------------|
| Rest of East and South East Asia | XSE  | KHM | Cambodia                                   |
| Rest of Asia                     | XSA  | KIR | Kiribati                                   |
| Rest of Latin America            | XLM  | KNA | Saint Kitts and Nevis                      |
| Rest of East and South East Asia | XSE  | KOR | Korea, Republic of                         |
| Middle East                      | XME  | KWT | Kuwait                                     |
| Rest of East and South East Asia | XSE  | LAO | Lao People's Democratic Republic           |
| Middle East                      | XME  | LBN | Lebanon                                    |
| Other Africa                     | XAF  | LBR | Liberia                                    |
| North Africa                     | XNF  | LBY | Libyan Arab Jamahiriya                     |
| Rest of Latin America            | XLM  | LCA | Saint Lucia                                |
| Rest of Europe                   | XER  | LIE | Liechtenstein                              |
| Rest of Asia                     | XSA  | LKA | Sri Lanka                                  |
| Other Africa                     | XAF  | LSO | Lesotho                                    |
| EU                               | XE25 | LTU | Lithuania                                  |
| EU                               | XE25 | LUX | Luxembourg                                 |
| EU                               | XE25 | LVA | Latvia                                     |
| North Africa                     | XNF  | MAR | Morocco                                    |
| Rest of Europe                   | XER  | MCO | Monaco                                     |
| Former USSR                      | CIS  | MDA | Moldova, Republic of                       |
| Other Africa                     | XAF  | MDG | Madagascar                                 |
| Rest of Asia                     | XSA  | MDV | Maldives                                   |
| Rest of Latin America            | XLM  | MEX | Mexico                                     |
| Rest of Asia                     | XSA  | MHL | Marshall Islands                           |
| Rest of Europe                   | XER  | MKD | Macedonia, the former Yugoslav Republic of |
| Other Africa                     | XAF  | MLI | Mali                                       |
| EU                               | XE25 | MLT | Malta                                      |
| Rest of East and South East Asia | XSE  | MMR | Myanmar                                    |
| Rest of Europe                   | XER  | MNE | Montenegro                                 |
| Rest of East and South East Asia | XSE  | MNG | Mongolia                                   |
| Rest of Asia                     | XSA  | MNP | Northern Mariana Islands                   |
| Other Africa                     | XAF  | MOZ | Mozambique                                 |
| Other Africa                     | XAF  | MRT | Mauritania                                 |
| Rest of Latin America            | XLM  | MSR | Montserrat                                 |
| Rest of Latin America            | XLM  | MTQ | Martinique                                 |

|                                  |      |     |                                        |
|----------------------------------|------|-----|----------------------------------------|
| Other Africa                     | XAF  | MUS | Mauritius                              |
| Other Africa                     | XAF  | MWI | Malawi                                 |
| Rest of East and South East Asia | XSE  | MYS | Malaysia                               |
| Other Africa                     | XAF  | MYT | Mayotte                                |
| Other Africa                     | XAF  | NAM | Namibia                                |
| Rest of Asia                     | XSA  | NCL | New Caledonia                          |
| Other Africa                     | XAF  | NER | Niger                                  |
| Rest of Asia                     | XSA  | NFK | Norfolk Island                         |
| Other Africa                     | XAF  | NGA | Nigeria                                |
| Rest of Latin America            | XLM  | NIC | Nicaragua                              |
| Rest of Asia                     | XSA  | NIU | Niue                                   |
| EU                               | XE25 | NLD | Netherlands                            |
| Rest of Europe                   | XER  | NOR | Norway                                 |
| Rest of Asia                     | XSA  | NPL | Nepal                                  |
| Rest of Asia                     | XSA  | NRU | Nauru                                  |
| New Zealand and Australia        | XOC  | NZL | New Zealand                            |
| Middle East                      | XME  | OMN | Oman                                   |
| Rest of Asia                     | XSA  | PAK | Pakistan                               |
| Rest of Latin America            | XLM  | PAN | Panama                                 |
| Rest of Asia                     | XSA  | PCN | Pitcairn                               |
| Rest of Latin America            | XLM  | PER | Peru                                   |
| Rest of East and South East Asia | XSE  | PHL | Philippines                            |
| Rest of Asia                     | XSA  | PLW | Palau                                  |
| Rest of Asia                     | XSA  | PNG | Papua New Guinea                       |
| EU                               | XE25 | POL | Poland                                 |
| Rest of Latin America            | XLM  | PRI | Puerto Rico                            |
| Rest of East and South East Asia | XSE  | PRK | Korea, Democratic People's Republic of |
| EU                               | XE25 | PRT | Portugal                               |
| Rest of Latin America            | XLM  | PRY | Paraguay                               |
| Rest of Asia                     | XSA  | PYF | French Polynesia                       |
| Middle East                      | XME  | QAT | Qatar                                  |
| Other Africa                     | XAF  | REU | Réunion                                |
| Rest of Europe                   | XER  | ROU | Romania                                |
| Former USSR                      | CIS  | RUS | Russian Federation                     |
| Other Africa                     | XAF  | RWA | Rwanda                                 |

|                                  |      |     |                                              |
|----------------------------------|------|-----|----------------------------------------------|
| Middle East                      | XME  | SAU | Saudi Arabia                                 |
| Other Africa                     | XAF  | SDN | Sudan                                        |
| Other Africa                     | XAF  | SEN | Senegal                                      |
| Rest of East and South East Asia | XSE  | SGP | Singapore                                    |
| Rest of Latin America            | XLM  | SGS | South Georgia and the South Sandwich Islands |
| Other Africa                     | XAF  | SHN | Saint Helena, Ascension and Tristan da Cunha |
| Rest of Europe                   | XER  | SJM | Svalbard and Jan Mayen                       |
| Rest of Asia                     | XSA  | SLB | Solomon Islands                              |
| Other Africa                     | XAF  | SLE | Sierra Leone                                 |
| Rest of Latin America            | XLM  | SLV | El Salvador                                  |
| Rest of Europe                   | XER  | SMR | San Marino                                   |
| Other Africa                     | XAF  | SOM | Somalia                                      |
| Rest of Latin America            | XLM  | SPM | Saint Pierre and Miquelon                    |
| Rest of Europe                   | XER  | SRB | Serbia                                       |
| Other Africa                     | XAF  | STP | Sao Tome and Principe                        |
| Rest of Latin America            | XLM  | SUR | Suriname                                     |
| EU                               | XE25 | SVK | Slovakia                                     |
| EU                               | XE25 | SVN | Slovenia                                     |
| EU                               | XE25 | SWE | Sweden                                       |
| Other Africa                     | XAF  | SWZ | Swaziland                                    |
| Other Africa                     | XAF  | SYC | Seychelles                                   |
| Middle East                      | XME  | SYR | Syrian Arab Republic                         |
| Rest of Latin America            | XLM  | TCA | Turks and Caicos Islands                     |
| Other Africa                     | XAF  | TCD | Chad                                         |
| Other Africa                     | XAF  | TGO | Togo                                         |
| Rest of East and South East Asia | XSE  | THA | Thailand                                     |
| Former USSR                      | CIS  | TJK | Tajikistan                                   |
| Rest of Asia                     | XSA  | TKL | Tokelau                                      |
| Former USSR                      | CIS  | TKM | Turkmenistan                                 |
| Rest of East and South East Asia | XSE  | TLS | Timor-Leste                                  |
| Rest of Asia                     | XSA  | TON | Tonga                                        |
| Rest of Latin America            | XLM  | TTO | Trinidad and Tobago                          |
| North Africa                     | XNF  | TUN | Tunisia                                      |
| Turkey                           | TUR  | TUR | Turkey                                       |

|                                  |     |     |                                      |
|----------------------------------|-----|-----|--------------------------------------|
| Rest of Asia                     | XSA | TUV | Tuvalu                               |
| Rest of East and South East Asia | XSE | TWN | Taiwan                               |
| Other Africa                     | XAF | TZA | Tanzania, United Republic of         |
| Other Africa                     | XAF | UGA | Uganda                               |
| Former USSR                      | CIS | UKR | Ukraine                              |
| Rest of Asia                     | XSA | UMI | United States Minor Outlying Islands |
| Rest of Latin America            | XLM | URY | Uruguay                              |
| USA                              | USA | USA | United States                        |
| Former USSR                      | CIS | UZB | Uzbekistan                           |
| Rest of Europe                   | XER | VAT | Holy See (Vatican City State)        |
| Rest of Latin America            | XLM | VCT | Saint Vincent and the Grenadines     |
| Rest of Latin America            | XLM | VEN | Venezuela, Bolivarian Republic of    |
| Rest of Latin America            | XLM | VGB | Virgin Islands, British              |
| Rest of Latin America            | XLM | VIR | Virgin Islands, U.S.                 |
| Rest of East and South East Asia | XSE | VNM | Viet Nam                             |
| Rest of Asia                     | XSA | VUT | Vanuatu                              |
| Rest of Asia                     | XSA | WLF | Wallis and Futuna                    |
| Rest of Asia                     | XSA | WSM | Samoa                                |
| Middle East                      | XME | YEM | Yemen                                |
| Other Africa                     | XAF | ZAF | South Africa                         |
| Other Africa                     | XAF | ZMB | Zambia                               |
| Other Africa                     | XAF | ZWE | Zimbabwe                             |

---



## Supplementary Figures

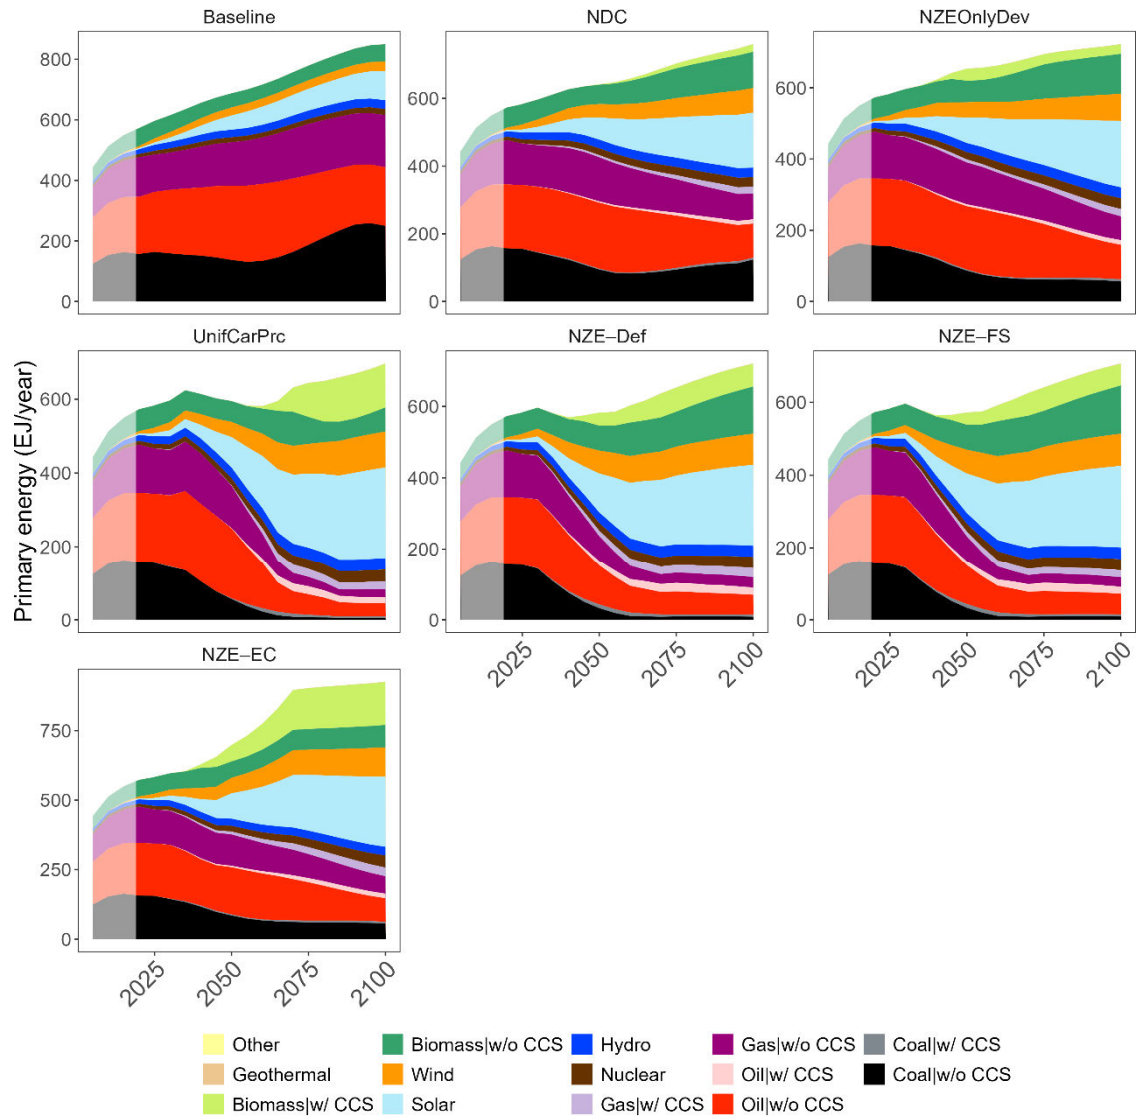

**Supplementary Fig. 1 | Global primary energy supply under the reference and core scenarios. The shaded area for 2005–2019 represents historical records from energy balances by the International Energy Agency (IEA).**

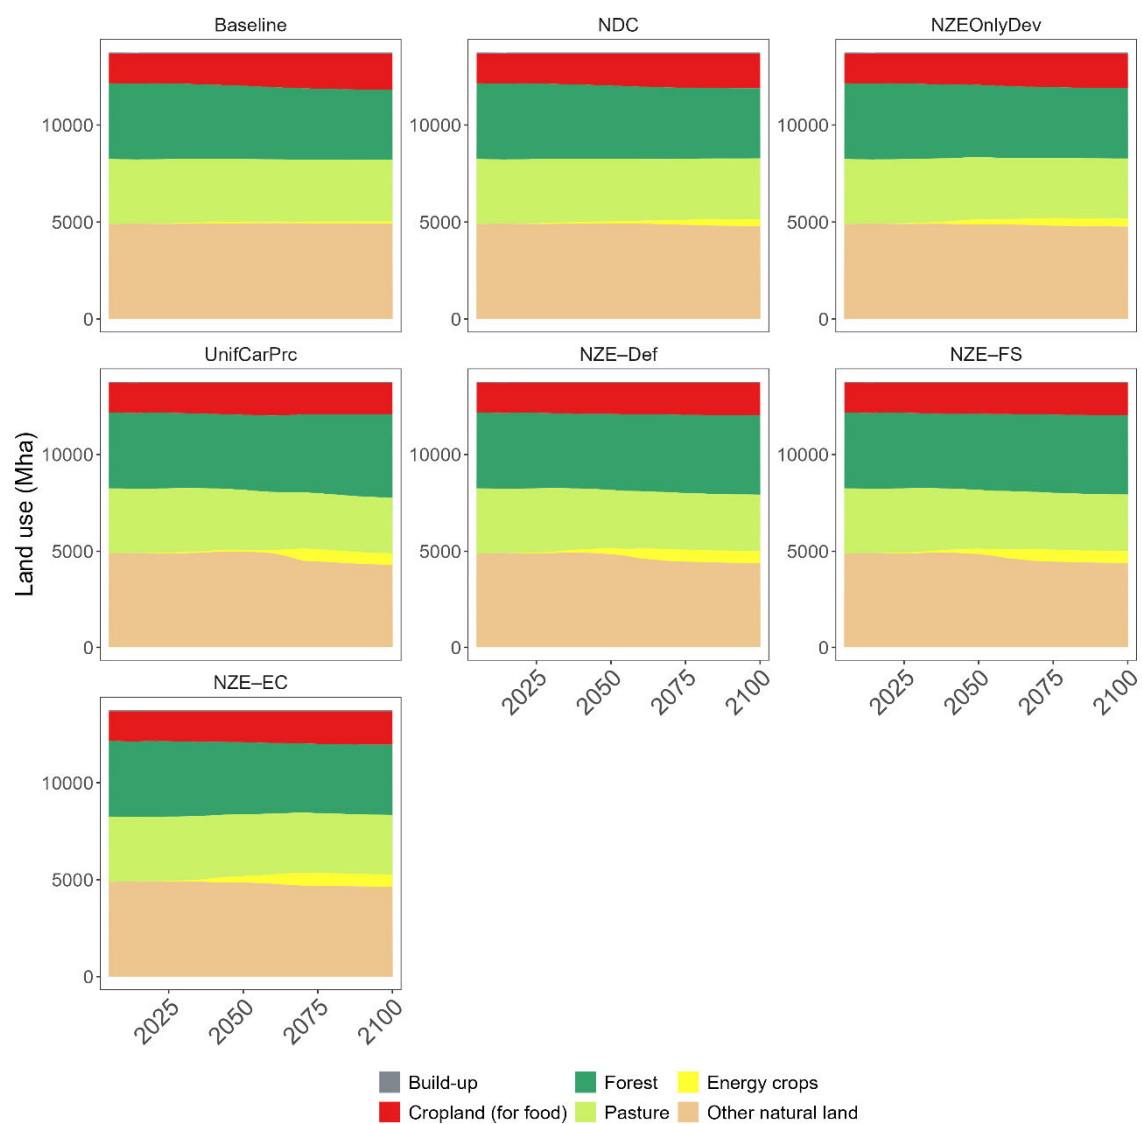

**Supplementary Fig. 2 | Global land use under the reference and core scenarios.**

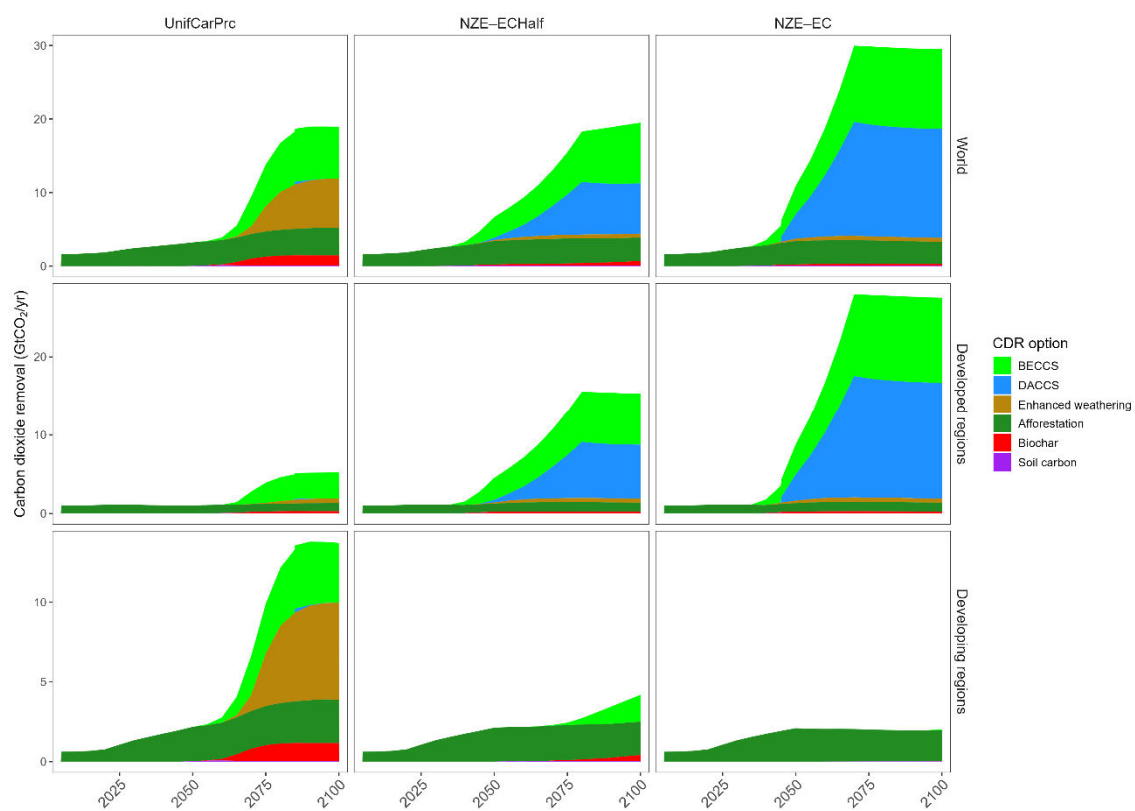

**Supplementary Fig. 3 | CDR composition by region for the UnifCarPrc, NZE-EChalf, and NZE-EC scenarios.**

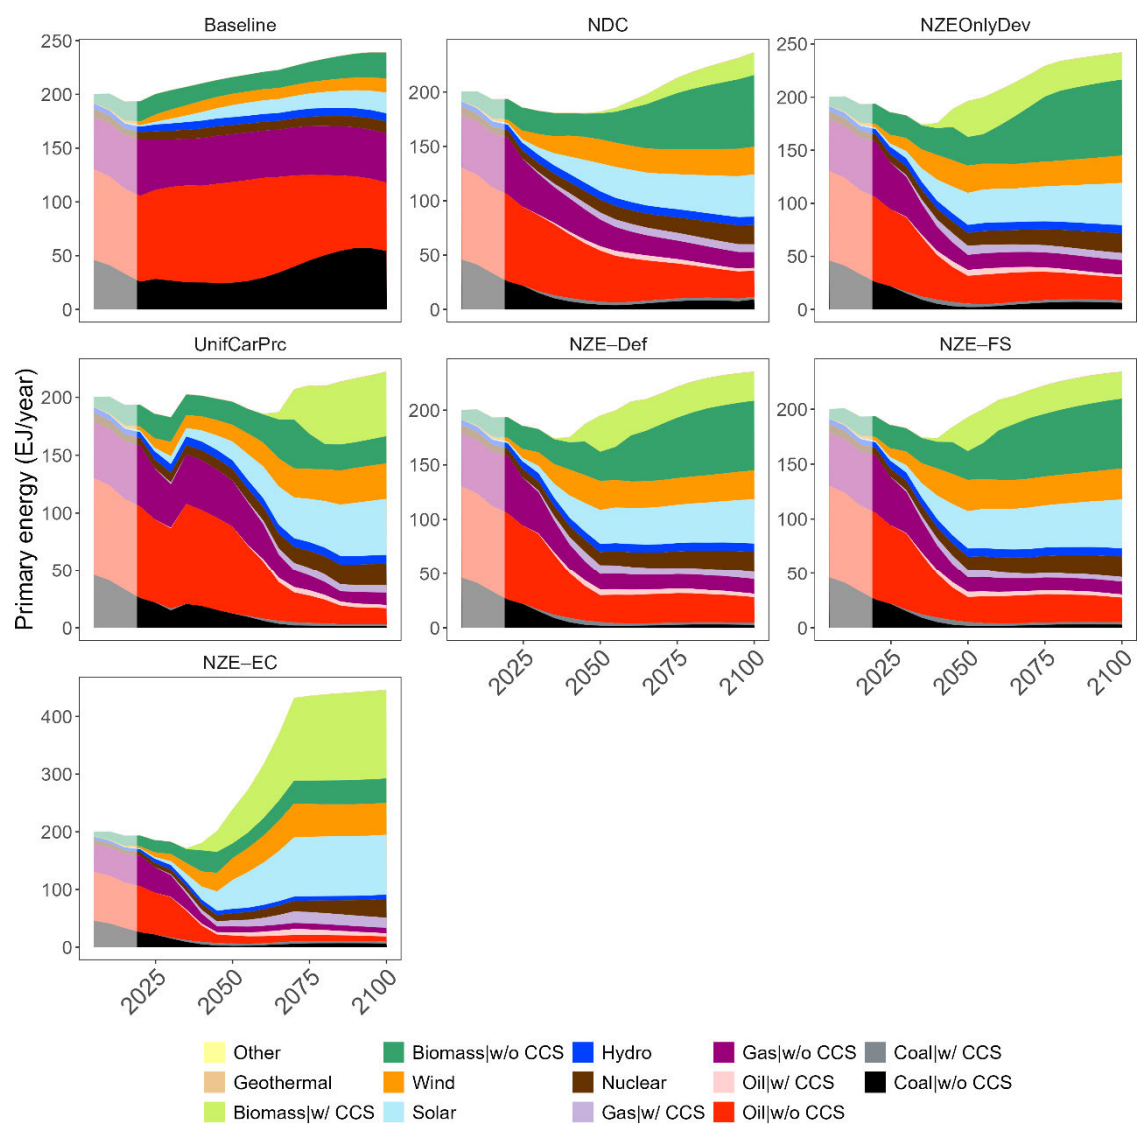

**Supplementary Fig. 4 | Primary energy supply in developed regions under the reference and core scenarios. The shaded area for 2005–2019 represents historical records from energy balances by the IEA**

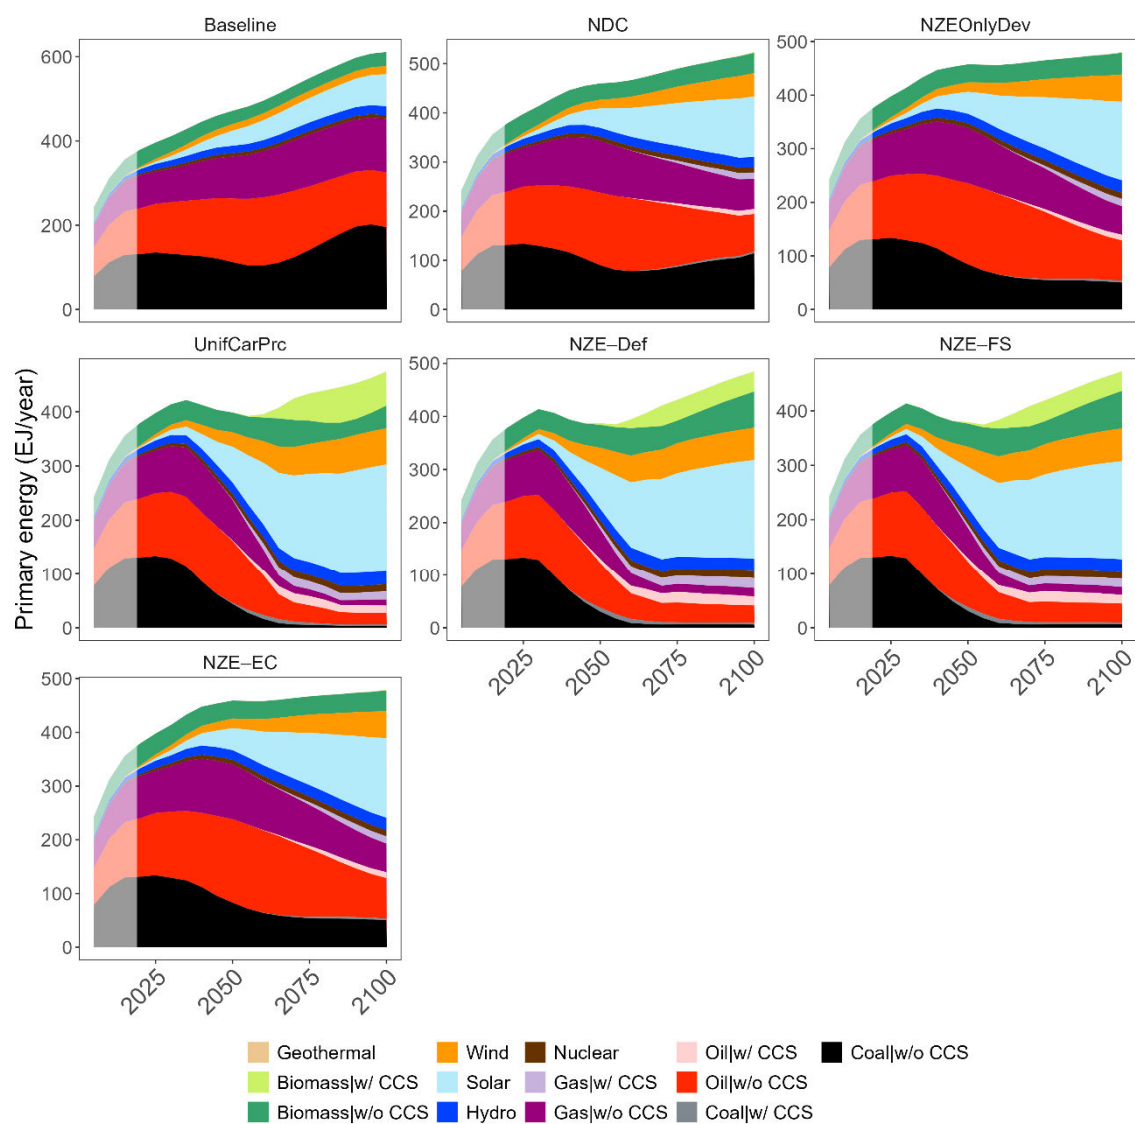

**Supplementary Fig. 5 | Primary energy supply in developing regions under the reference and core scenarios. The shaded area for 2005–2019 represents historical records from energy balances by the IEA**

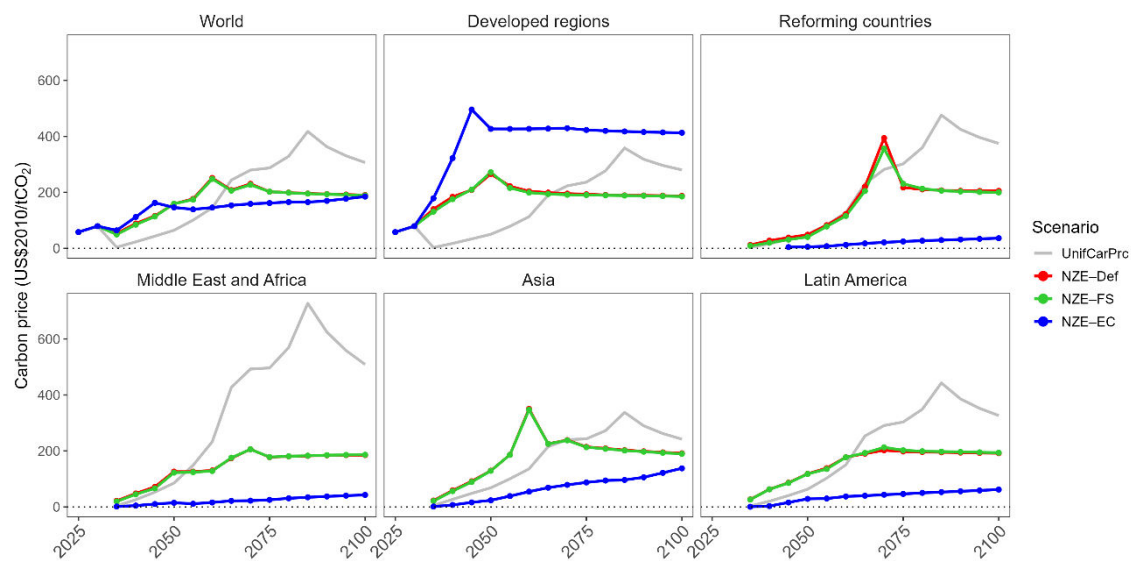

**Supplementary Fig. 6 | Regional carbon prices for the core and UnifCarPrc scenarios**

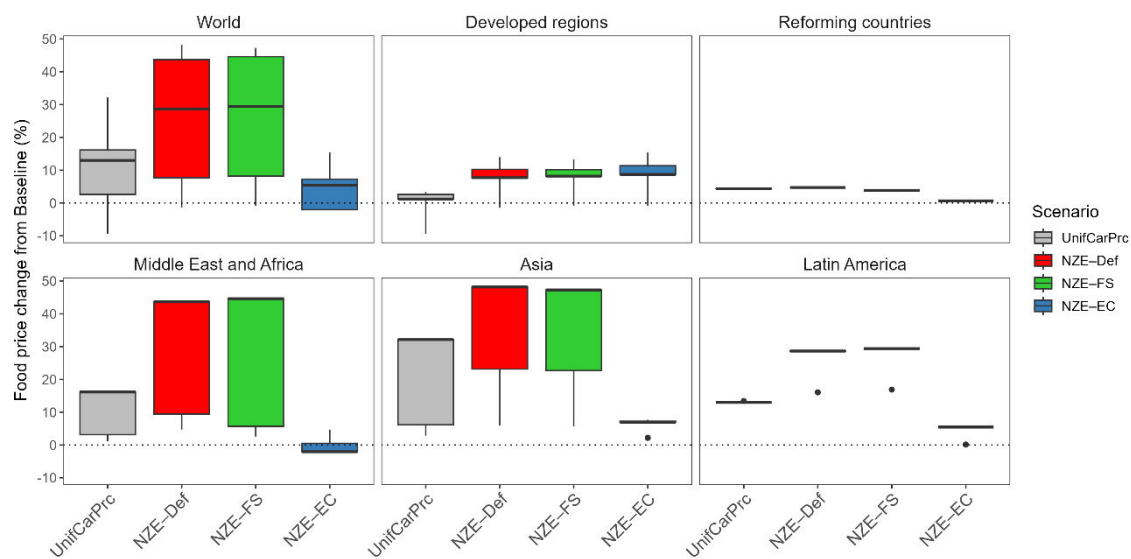

**Supplementary Fig. 7 | Regional food price changes from the baseline scenario in 2050. The box plot indicates all countries classified for each R5 regions are plotted as ranges (25-75% is within box and whiskers extend to the largest/smallest values within 1.5 times the IQR from the hinges).**

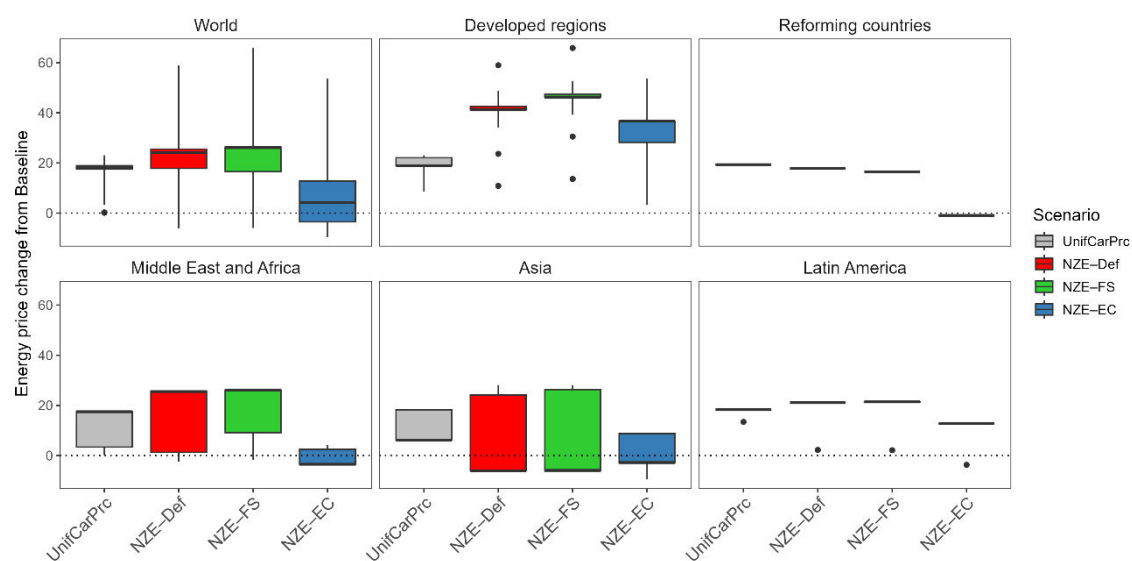

**Supplementary Fig. 8 | Regional energy price changes from the baseline scenario in 2050. The box plot indicates all countries classified for each R5 regions are plotted as ranges (25-75% is within box and whiskers extend to the largest/smallest values within 1.5 times the IQR from the hinges).**

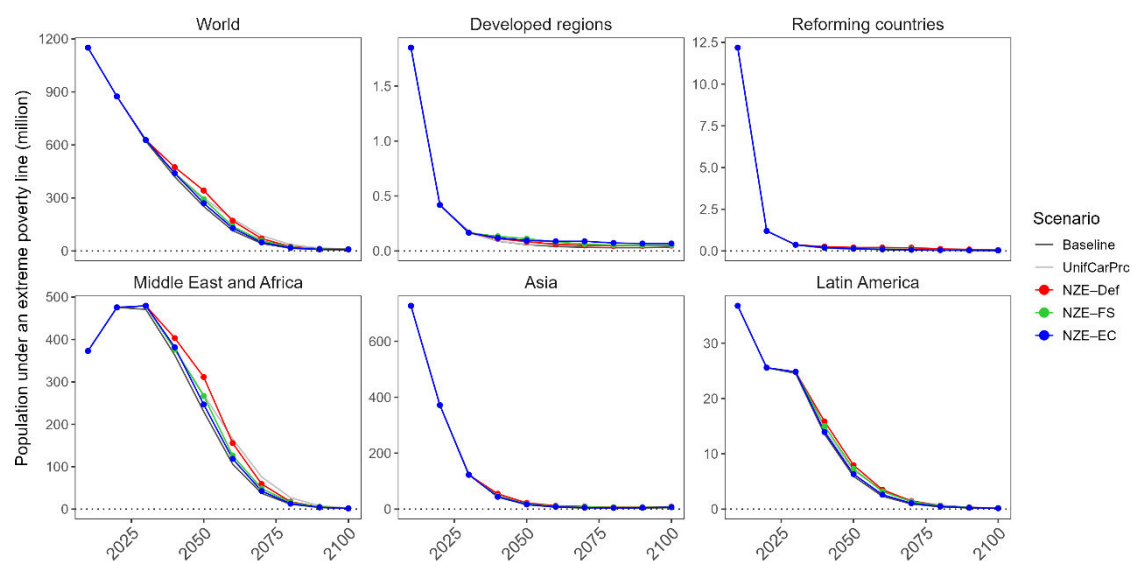

**Supplementary Fig. 9 | Time-series data for the population under an extreme poverty line**

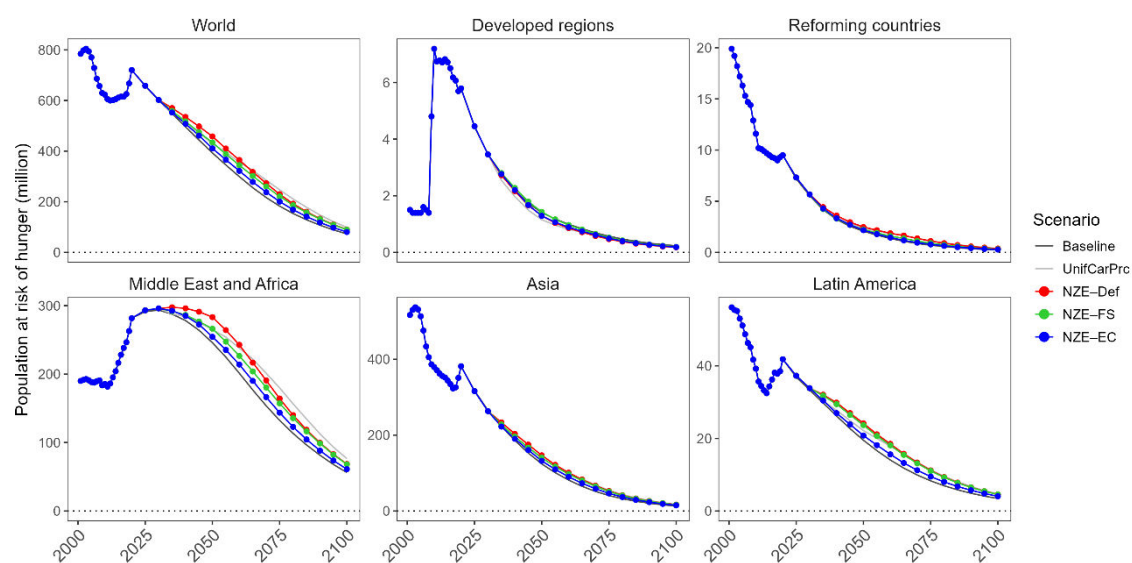

**Supplementary Fig. 10 | Time-series data for the hunger-risk population**



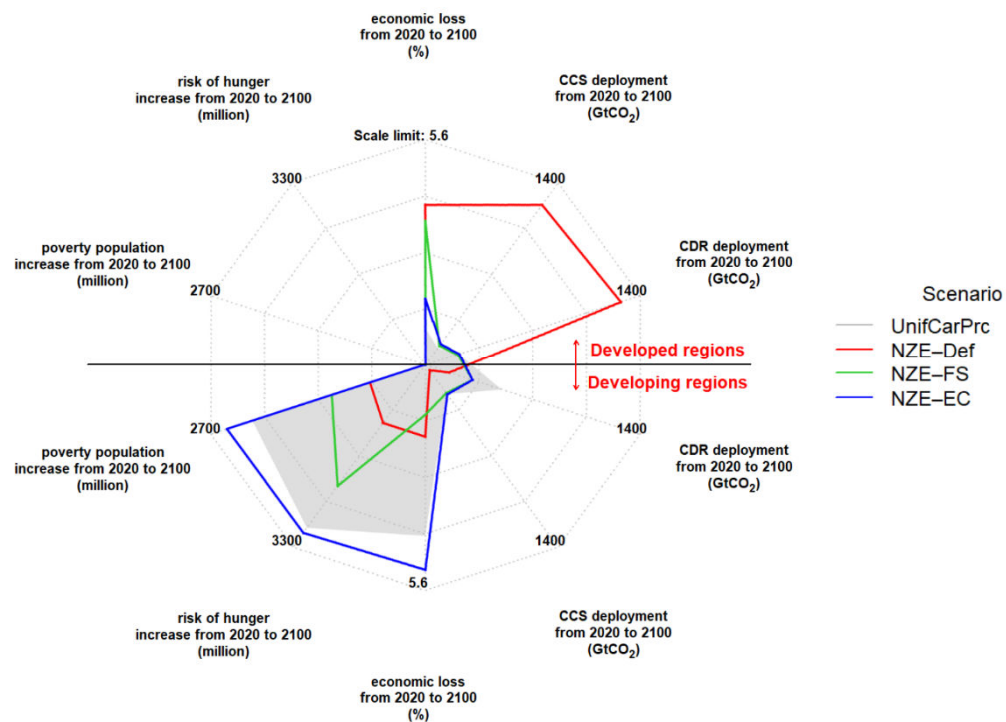

**Supplementary Fig. 11 | Indicators used to examine differences between global emissions reduction options. Indicators include consumption loss rates in developing countries and developed countries, CDR, CCS, and populations at risk of hunger and poverty. All indicators are cumulative values from 2020 to 2100, shown for developing and developed regions, respectively. For population at risk of hunger and poverty headcount, the data have been linearly interpolated to provide estimates for each year.**



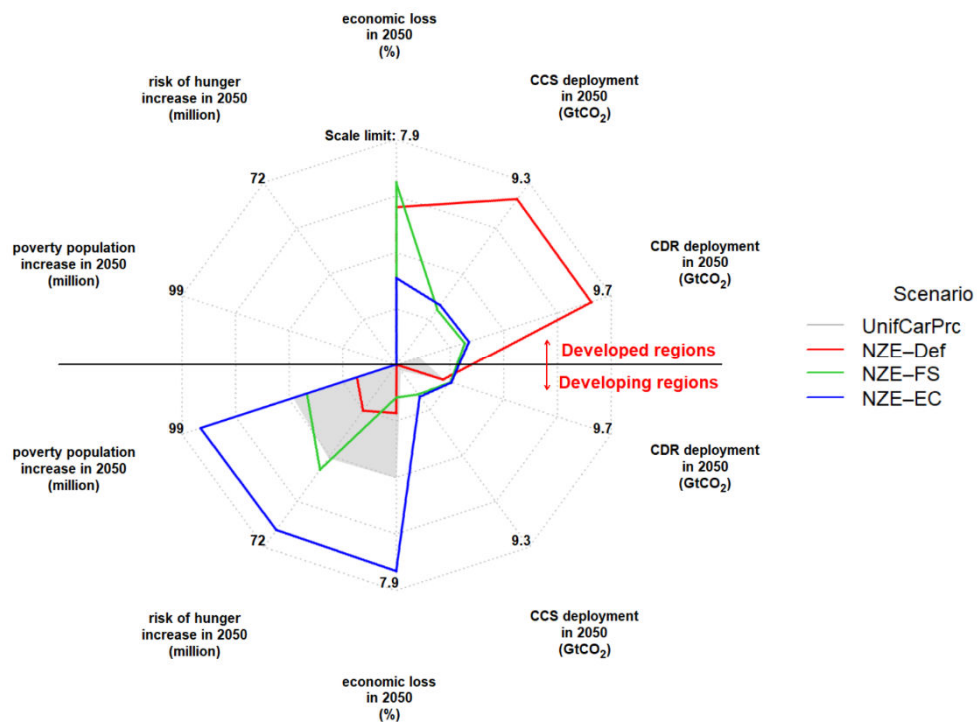

**Supplementary Fig. 13 | Indicators used to examine differences between global emissions reduction options. Indicators include consumption loss rates in developing countries and developed countries, CDR, CCS, and populations at risk of hunger and poverty. All indicators are for 2050, shown for developing and developed regions, respectively.**

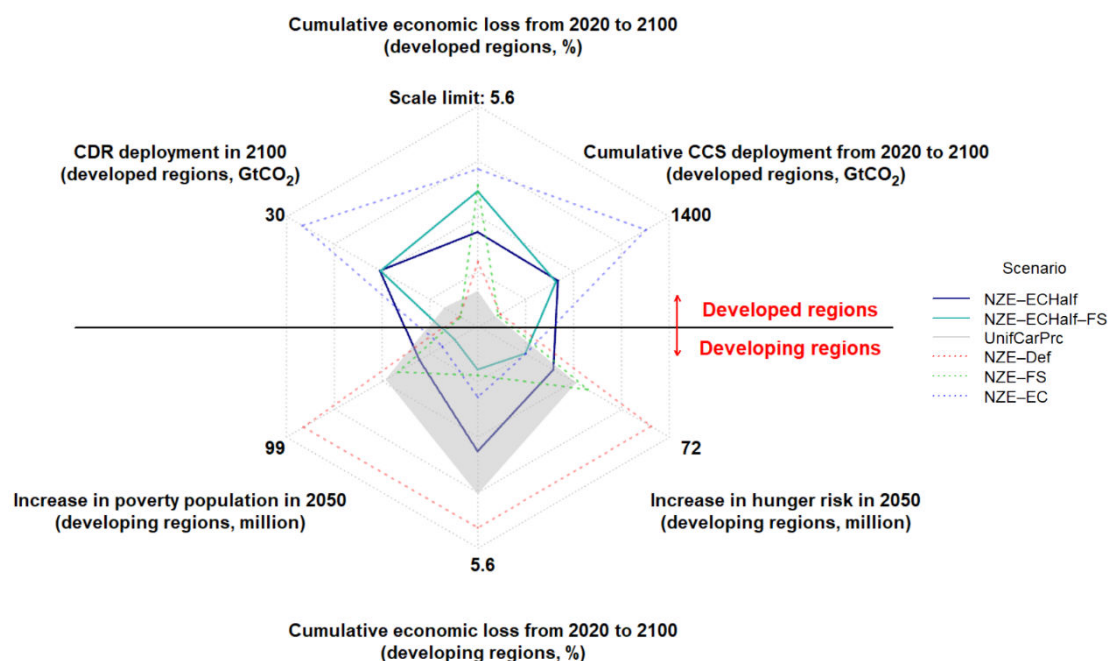

**Supplementary Fig. 14 | Indicators used to examine differences between global emissions reduction options. Indicators include consumption loss rates in developing countries and developed countries, CDR, CCS, and populations at risk of hunger and poverty. Data are based on a sensitivity assessment of half emissions reduction compensation.**

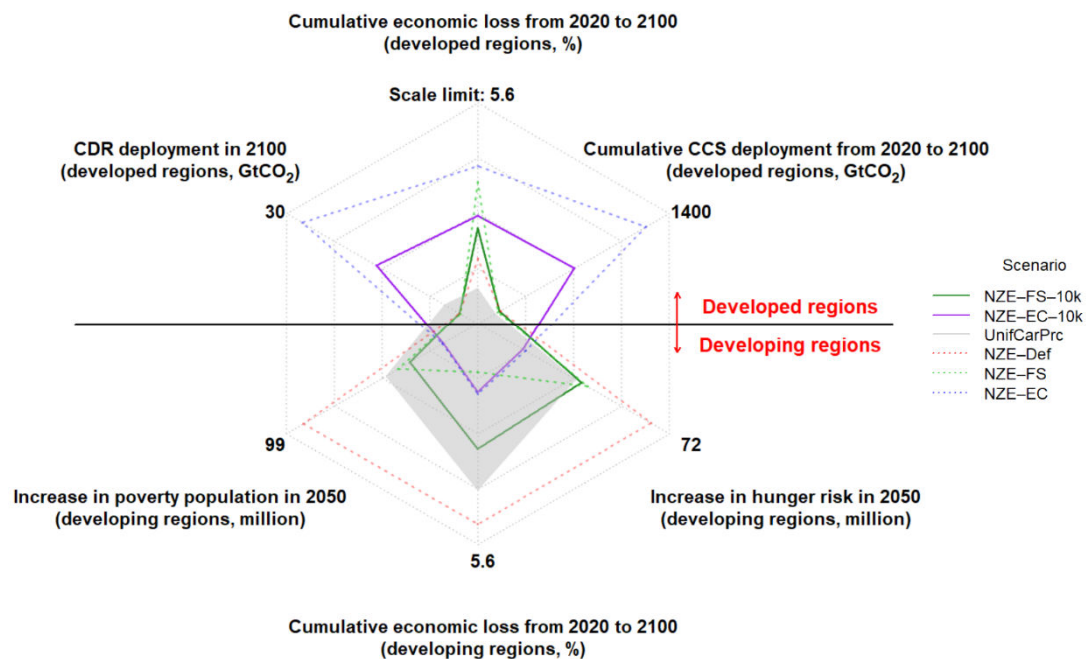

**Supplementary Fig. 15 | Indicators used to examine differences between global emissions reduction options. Indicators include consumption loss rates in developing countries and developed countries, CDR, CCS, and populations at risk of hunger and poverty. Data are based on a sensitivity assessment of the regional classification threshold**

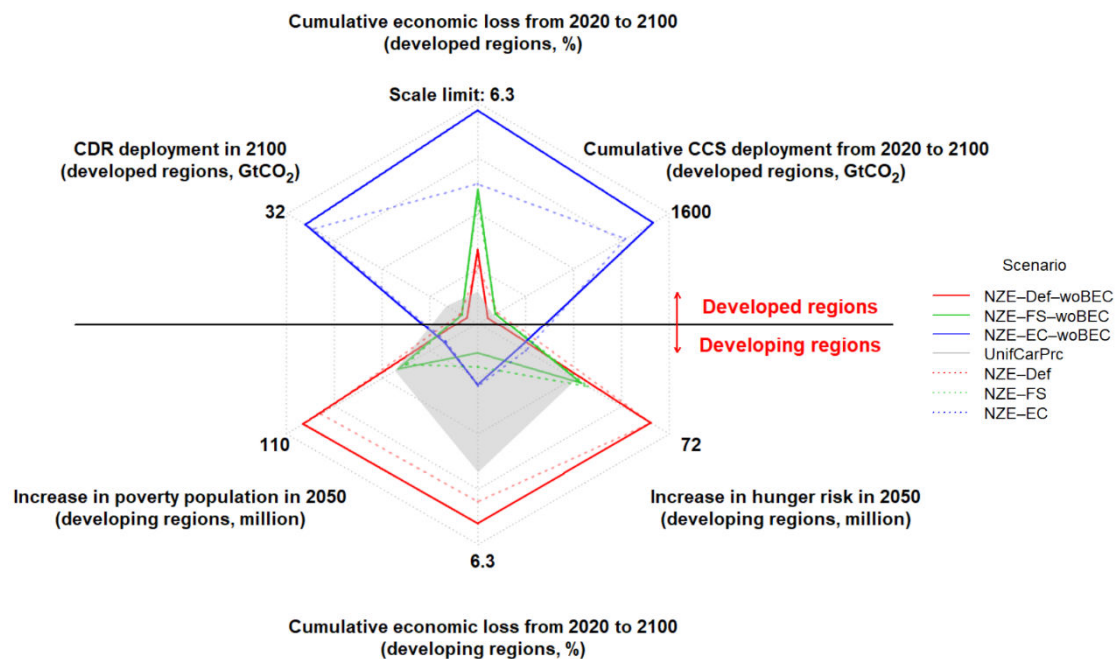

**Supplementary Fig. 16 | Indicators used to examine differences between global emissions reduction options. Indicators include consumption loss rates in developing countries and developed countries, CDR, CCS, and populations at risk of hunger and poverty. Data are based on a sensitivity assessment of the effects of excluding BECCS**

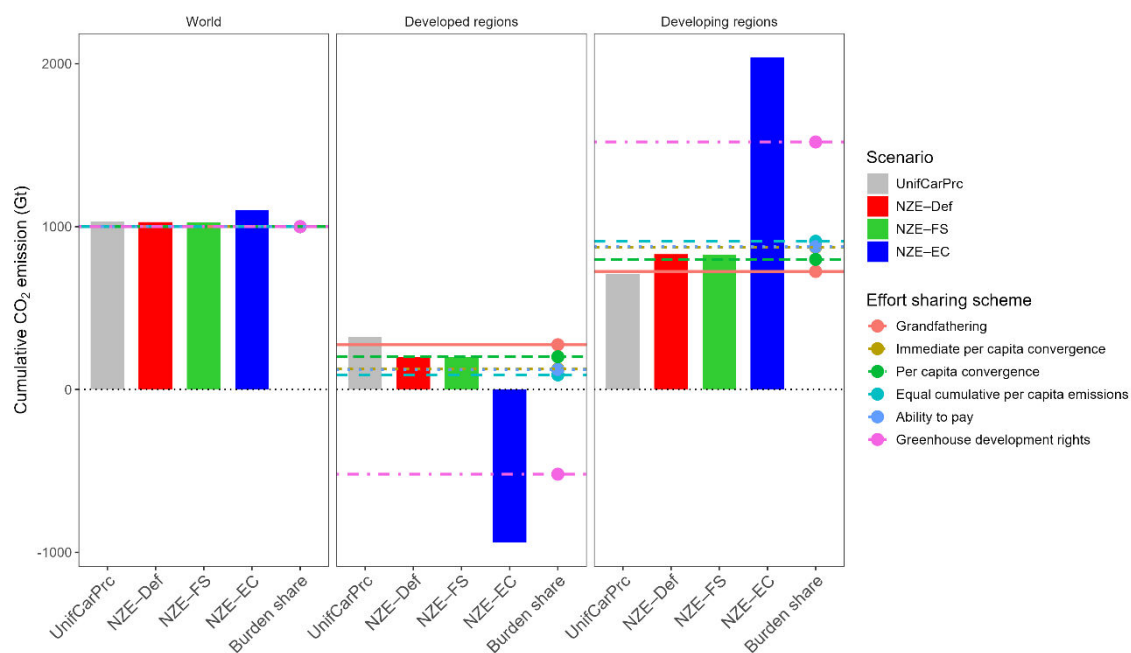

**Supplementary Fig. 17 | Projected cumulative CO<sub>2</sub> emissions and the cumulative carbon budget under different effort-sharing schemes. Results obtained including an immediate per capita convergence scheme and an ability-to-pay scheme overlap in the figure.**
